# Supplementary material
Source: publisher site journal article supplement (https://www.dovepress.com/article/302468)
Supplement: Supplementary file 1 [file get_supplementary_file.php]

Supplemental Table 1 Multivariate logistic regression analysis on the association of target organ damage with somatotype

|  | **Underweight**  **(n=** **100)** | **Normal**  **(n= 892)** | **Overweight**  **(n= 817)** | **Obesity**  **(n= 289)** |
| --- | --- | --- | --- | --- |
| **Cardiac TOD** | OR [95%CI] | OR [95%CI] | OR [95%CI] | OR [95%CI] |
| LVH | 0.51 [0.27, 0.97]***** | reference | 1.16 [0.92, 1.47] | 1.92 [1.42, 2.59]***** |
| LVDD | 1.34 [0.56, 3.27] | reference | 1.79 [1.20, 2.66]***** | 2.46 [1.53, 3.94]***** |
| **Vascular TOD** |  |  |  |  |
| Artery stiffness | 0.69 [0.38, 1.23] | reference | 1.13 [0.89, 1.43] | 1.61 [1.18, 2.19]***** |
| carotid arterial plaque | 0.59 [0.38, 0.91]***** | reference | 0.82 [0.67, 1.01] | 0.81 [0.60 1.08] |
| **Renal TOD** |  |  |  |  |
| Microalbuminuria | 1.56[1.01, 2.41]***** | reference | 1.30 [1.06, 1.59]***** | 1.30 [1.01, 1.78]***** |
| CKD | 1.34 [0.45, 4.00] | reference | 1.23 [0.75, 2.02] | 1.49 [0.77, 2.88] |

Multivariate logistic regression models were applied to investigate the association of TOD with somatotype, after adjustment for age, male gender, hypertension, diabetes, low density lipoprotein cholesterol, glomerular filtration rate. Odd ratio (OR) value and 95% confidence interval (CI) were present. LVH = left ventricular hypertrophy; LVDD = left ventricular diastolic dysfunction; CKD = chronic kidney dysfunction. * indicating significantly and independently correlation of TOD with somatotype, taking normal somatotype as reference. TOD = target organ damage.
